# Supplementary material for: Cannabidiol effectively prevents oxidative stress and stabilizes hypoxia-inducible factor-1 alpha (HIF-1α) in an animal model of global hypoxia
Source: Sci Rep. 2024 Jul 10;14:15952. doi: 10.1038/s41598-024-66599-5 (PMC11237132; doi:10.1038/s41598-024-66599-5)
Supplement: Supplementary file 1 — Supplementary Information. [file 41598_2024_66599_MOESM1_ESM.xlsx]

## Sheet: Raw Data
Group name	Sex	Tissue mass (mg)	Oxidative stress markers									HIF-1α	Iron staining
			MDA			8-epi PGF2α		GSH		TAC		Relative fluorescence intensity	% of blue area
H/VEH	male	138	14.068	14.152	13.55	0.173	0.173	0.14	0.134	14.535	14.232	1.79867e+08	2.91069
	male	143	15.956	16.241	16.107	0.187	0.189	0.071	0.135	13.273	13.025	2.2635e+08	1.71619
	male	110	21.341	21.872	20.706	0.201	0.213	0.127	0.122	13.677	13.876	182367824	3.38919
	male	138	20.249	20.369	20.39	0.238	0.213	0.092	0.087	14.385	14.413	3.4517e+07	1.56977
	female	154	22.058	23.016	21.872	0.366	0.366	0.046	0.104	17.915	16.146	2.2635e+08	1.24698
	female	128	16.96	17.131	17.419	0.293	0.31	0.082	0.102	15.902	13.897		1.31017
	female	133	25.762	25.857	25.224	0.174	0.173	0.062	0.16	13.311	12.621		1.20269
													1.19299
C/VEH	male	134	11.58	11.626	11.634	0.496	0.492	0.146	0.106	13.343	13.779	7.55725e+08
	male	127	12.113	12.162	13.586	0.423	0.423	0.094	0.094	15.752	10.396	7.21627e+08
	male	127	12.399	12.433	12.548	0.456	0.463	0.121	0.038	18.023	13.011	973521103
	male	143	10.631	10.704	10.673	0.566	0.578	0.146	0.079	12.757	13.705	1349011506
	female	122	8.716	8.324	8.21	0.512	0.474	0.07	0.077	11.554	13.58	1491156657
	female	132	12.917	13.005	13.085	0.473	0.553	0.092	0.073	10.33	15.39
	female	144	12.388	12.067	11.986	0.57	0.556	0.152	0.174	17.123	16.6
H/CBD	male	130	16.202	16.044	15.847	0.382	0.399	0.124	0.169	19.526	20.188	1655333738	0.650677
	male	101	11.417	11.736	11.338	0.328	0.33	0.209	0.129	15.651	19.676	1831756621	0.507915
	male	160	17.348	17.625	16.992	0.298	0.328	0.095	0.066	18.061	17.367	1670100849	0.406704
	male	128	14.743	14.427	14.546	0.339	0.339	0.119	0.107	20.139	19.358	1930582886	0.173404
	female	127	15.374	15.413	15.532	0.479	0.482	0.214	0.162	19.867	27.9547	2033031415	0.154035
	female	165	22.427	22.752	22.467	0.409	0.405	0.223	0.197	21.23	21.6829	1716646093	0.443437
	female	157	15.413	14.901	15.334	0.272	0.267	0.11	0.116	20.363	19.031		0.466781
	female	135	12.808	12.253	12.649	0.355	0.359	0.157	0.159	22.2056	18.828		0.040067
C/CBD	male	126	12.055	11.989	11.975	0.504	0.506	0.094	0.1	17.168	17.308	1.95254e+08
	male	129	11.189	11.362	11.481	0.353	0.339	0.091	0.039	16.471	17.144	197970491
	male	152	14.125	10.998	14.616	0.397	0.41	0.1665	0.155	19.425	18.65	3.64026e+08
	male	131	16.249	17.349	16.698	0.491	0.506	0.114	0.102	22.2753	21.6829	215956131
	female	146	15.597	16.086	15.801	0.578	0.574	0.151	0.174	19.4	21.9617	115153905
	female	174	16.861	18.081	18.162	0.474	0.476	0.108	0.169	24.784	23.6341
	female	198	20.273	20.962	20.192	0.626	0.626	0.332	0.167	23.1115	23.216
